# Supplementary material for: Zn(ii) complex with 2-quinolinecarboxaldehyde selenosemicarbazone: synthesis, structure, interaction studies with DNA/HSA, molecular docking and caspase-8 and -9 independent apoptose induction
Source: Royal Society of Chemistry journal article supplement (doi:10.1039/c5ra19849f), 2015-01-01
Supplement: c5ra19849f1.pdf [file c5ra19849f1.pdf]

## **Electronic Supplementary Information**

### **Zn(II) complex with 2-quinolinecarboxaldehyde selenosemicarbazone: synthesis, structure, interaction studies with DNA/HSA, molecular docking and caspase-8 and -9 independent apoptosis induction**

Nenad R. Filipović<sup>a</sup>, Snežana Bjelogrić<sup>b</sup>, Aleksandar Marinković<sup>c</sup>, Tatjana Ž. Verbić<sup>d</sup>, Ilija N. Cvijetić<sup>e</sup>, Milan Senčanski<sup>f</sup>, Marko Rodić<sup>g</sup>, Miroslava Vujčić<sup>h</sup>, Dušan Sladić<sup>d</sup>, Zlatko Striković<sup>d</sup>, Tamara R. Todorović,<sup>d\*</sup> Christian D. Muller<sup>i,j\*</sup>

<sup>a</sup> *Department of Chemistry and Biochemistry, Faculty of Agriculture, University of Belgrade, Nemanjina 6, Belgrade, Serbia;* <sup>b</sup> *National Cancer Research Center of Serbia, Pasterova 14, Belgrade, Serbia;* <sup>c</sup> *Faculty of Technology and Metallurgy, University of Belgrade, Karnegijeva 4, Belgrade, Serbia;* <sup>d</sup> *Faculty of Chemistry, University of Belgrade, Studentski trg 12-16, Belgrade, Serbia;* <sup>e</sup> *Innovation Center of the Faculty of Chemistry, University of Belgrade, Studentski trg 12-16, Belgrade, Serbia,* <sup>f</sup> *Center for Multidisciplinary Research, Institute of Nuclear Sciences Vinča, University of Belgrade, Belgrade, Serbia;* <sup>g</sup> *Department of Chemistry, Faculty of Sciences, University of Novi Sad, Trg Dositeja Obradovića 4, Novi Sad, Serbia;* <sup>h</sup> *Institute of Chemistry, Technology and Metallurgy, University of Belgrade, Njegoševa 12, Belgrade, Serbia;* <sup>i</sup> *Laboratoire d'Innovation Thérapeutique, UMR 7200, Faculté de Pharmacie, Université de Strasbourg, 67401 Illkirch, France;* <sup>j</sup> *Plateforme eBioCyt, Faculté de Pharmacie & Fédération Translationnelle de Médecine, Université de Strasbourg, 67401 Illkirch, France.*

\*Corresponding authors:

Dr. Tamara R. Todorović  
**E-mail:** tamarat@chem.bg.ac.rs  
**Tel:** +381 11 3336-685  
**Fax:** +381 11 2184-330

Dr. Christian D. Muller  
**E-mail:** cdmuller@unistra.fr  
**Tel:** +33-688285839  
**Fax:** +33-368854310

## Content

|                                                                                                                                                   |    |
|---------------------------------------------------------------------------------------------------------------------------------------------------|----|
| <b>Figure S1.</b> Experimental and theoretical FT-IR spectra of <b>1</b> .....                                                                    | 4  |
| <b>Figure S2.</b> $^1\text{H}$ NMR spectrum of <b>1</b> in $\text{DMSO}-d_6$ .....                                                                | 5  |
| <b>Figure S3.</b> $^{13}\text{C}$ NMR spectrum of <b>1</b> in $\text{DMSO}-d_6$ .....                                                             | 5  |
| <b>Figure S4.</b> COSY spectrum of <b>1</b> .....                                                                                                 | 6  |
| <b>Figure S5.</b> NOESY spectrum of <b>1</b> .....                                                                                                | 6  |
| <b>Figure S6.</b> $^1\text{H}$ – $^{13}\text{C}$ HSQC spectrum of <b>1</b> .....                                                                  | 7  |
| <b>Figure S7.</b> $^1\text{H}$ – $^{13}\text{C}$ HMBC spectrum of <b>1</b> .....                                                                  | 7  |
| <b>Figure S8.</b> Superimposed $^1\text{H}$ and $^{13}\text{C}$ NMR spectra of Hqasesc and <b>1</b> .....                                         | 8  |
| <b>Figure S9.</b> Superimposed $^1\text{H}$ NMR spectra of freshly prepared sample of <b>1</b> and sample after 24 h .....                        | 9  |
| <b>Figure S10.</b> Cyclic voltammograms of Hqasesc, <b>1</b> , and <b>1</b> with addition of zinc perchlorate .....                               | 9  |
| <b>Figure S11.</b> UV/Vis spectra of Hqasesc in pH range 1.65–5.17 and determination of $K_{a1}$ at 341 nm. ....                                  | 10 |
| <b>Figure S12.</b> UV/Vis spectra of Hqasesc in pH range 5.17–11.91 and determination of $K_{a2}$ at 365 nm .....                                 | 10 |
| <b>Figure S13.</b> Packing diagram in the crystal structure of Hqasesc .....                                                                      | 11 |
| <b>Figure S14.</b> Packing diagram in the crystal structure of <b>1</b> .....                                                                     | 11 |
| <b>Figure S15.</b> Sigmoidal dose-response curves with ED50 values for Hqasesc, <b>1</b> and CDDP on THP-1 and AsPC-1 cells .....                 | 13 |
| <b>Figure S16.</b> Stern-Volmer plot of $F_0/F$ vs. $[\text{Q}]$ at three different temperatures .....                                            | 14 |
| <b>Figure S17.</b> Modified Stern-Volmer plot for binding of <b>1</b> to HSA at three temperatures .....                                          | 14 |
| <b>Figure S18.</b> The plot of $\ln K_a$ vs. $1/T$ for the interaction of <b>1</b> with HSA .....                                                 | 15 |
| <b>Figure S19.</b> Double-log plot for determination of binding constants $K_b$ , and the number of binding sites $n$ at three temperatures ..... | 15 |
| <b>Figure S20.</b> Spectral overlap of the complex <b>1</b> absorption with HSA fluorescence emission .....                                       | 16 |
| <b>Figure S21.</b> All conformations of <b>1</b> in the DNA duplex .....                                                                          | 16 |
| <b>Figure S22.</b> Structure of HSA and the location of complex <b>1</b> binding site .....                                                       | 17 |
| <b>Scheme S1.</b> Numbering of atoms of Hqasesc in <b>1</b> .....                                                                                 | 4  |

|                                                                                 |    |
|---------------------------------------------------------------------------------|----|
| <b>Table S1.</b> Hydrogen bonding geometry (Å, °) in Hqasesc and <b>1</b> ..... | 12 |
| <b>Table S2.</b> Interactions of HSA binding site atoms with <b>1</b> .....     | 18 |
| <b>References</b> .....                                                         | 18 |

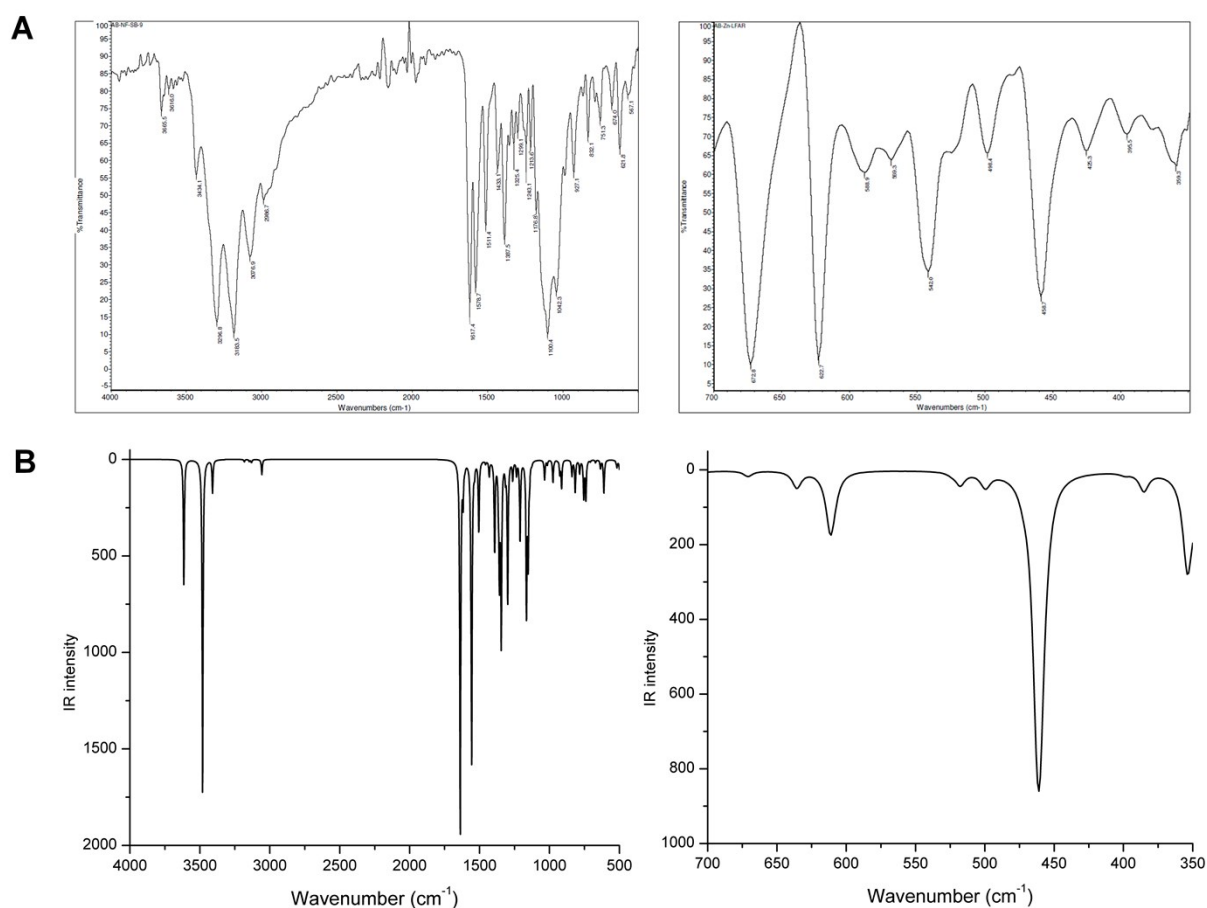

**Figure S1.** Experimental (A) and theoretical (B) FT-IR spectra of **1**.

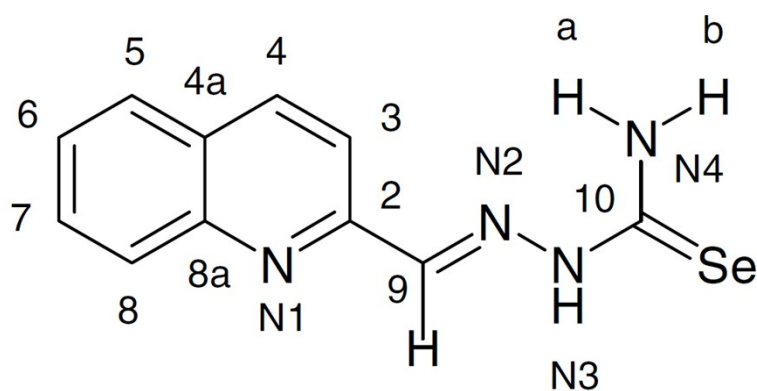

**Scheme S1.** Numbering of atoms of Hqasesc in **1**, used in NMR.

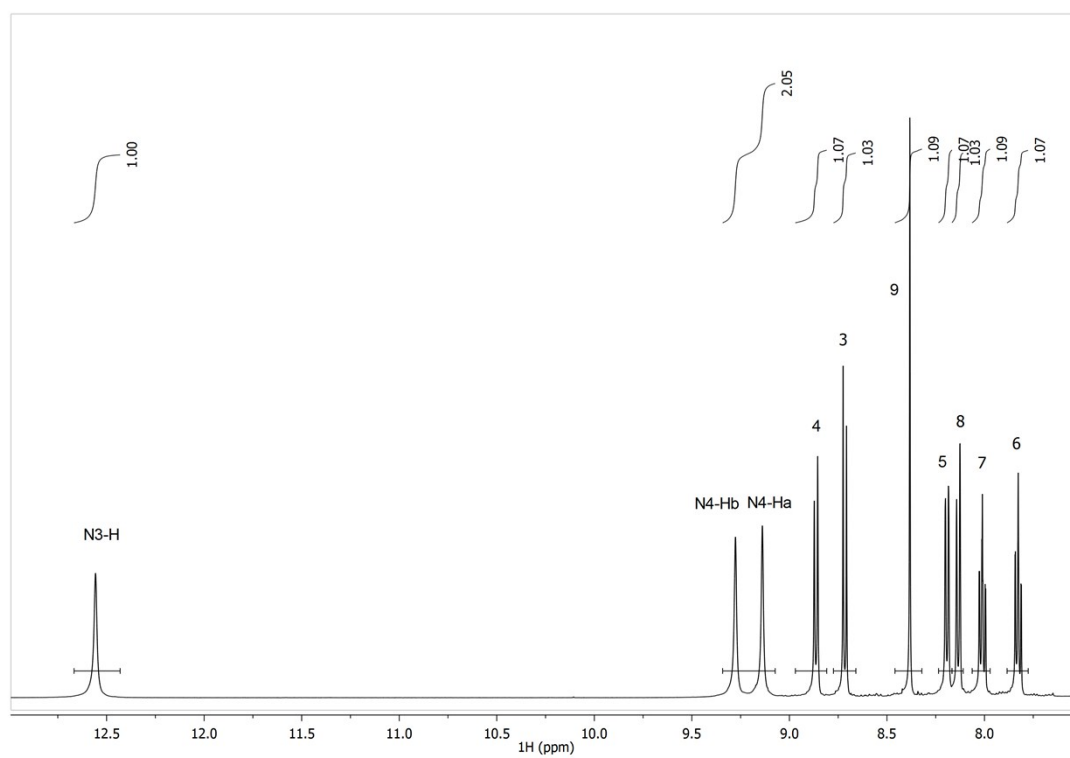

**Figure S2.**  $^1\text{H}$  NMR spectrum of **1** in  $\text{DMSO-}d_6$ .

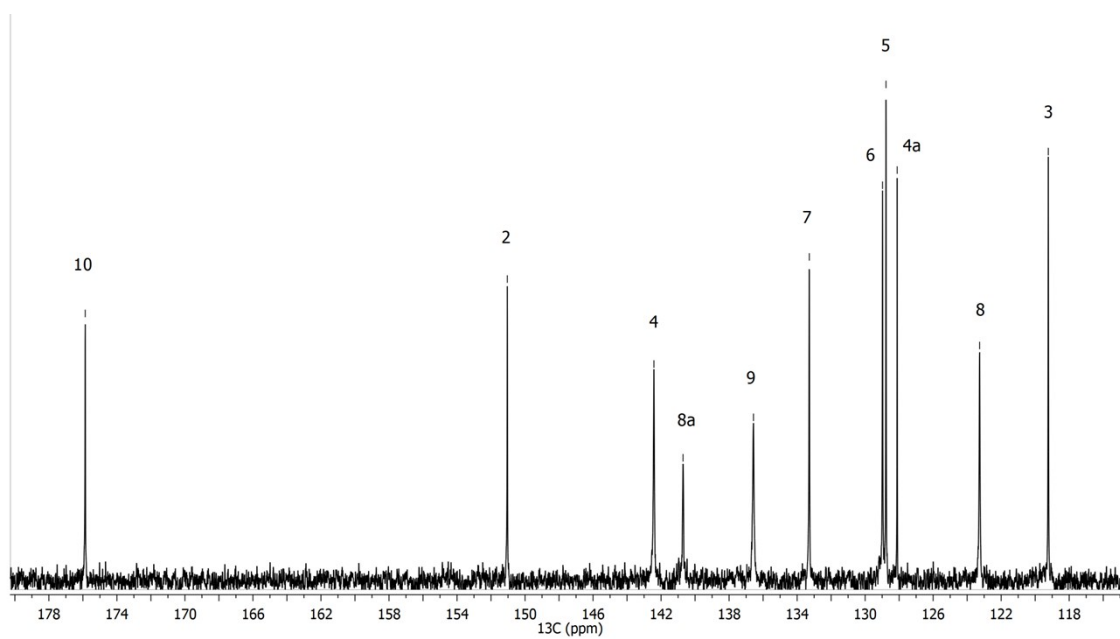

**Figure S3.**  $^{13}\text{C}$  NMR spectrum of **1** in  $\text{DMSO-}d_6$ .

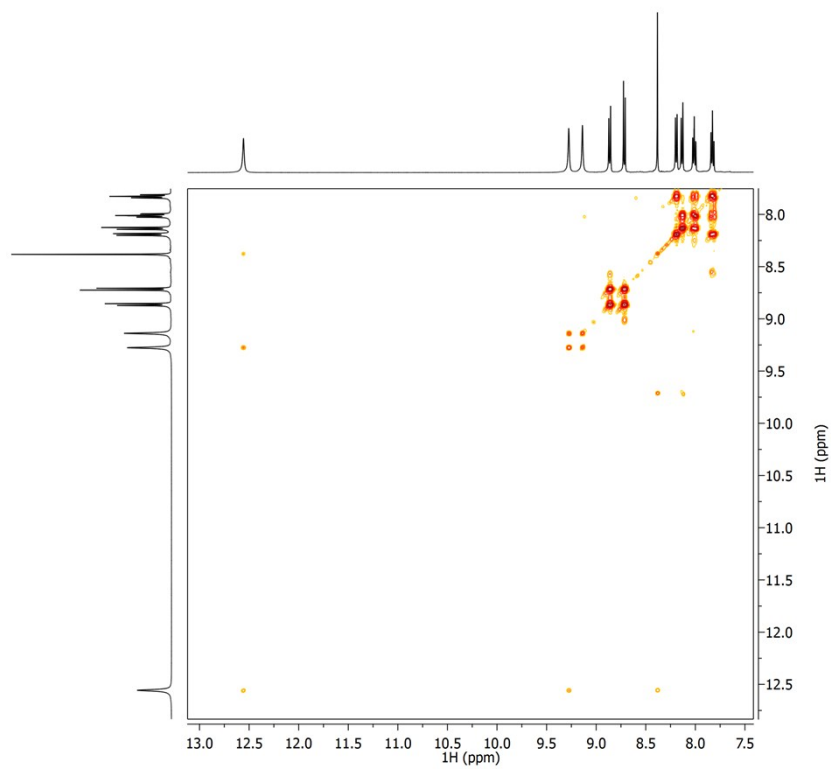

**Figure S4.** COSY spectrum of **1**.

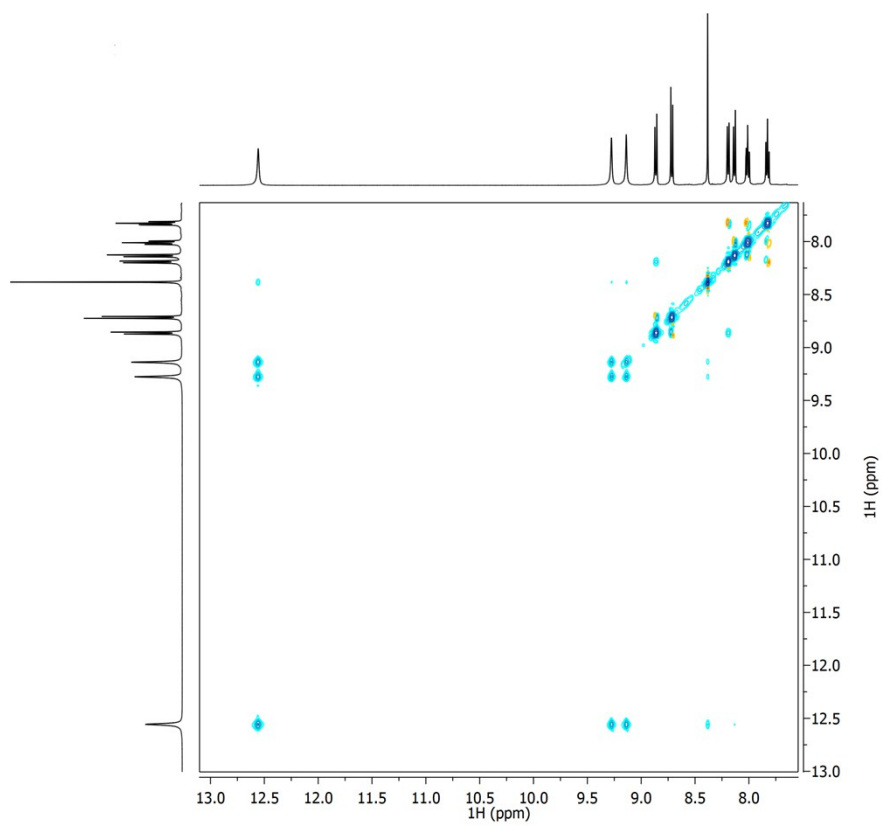

**Figure S5.** NOESY spectrum of **1**.

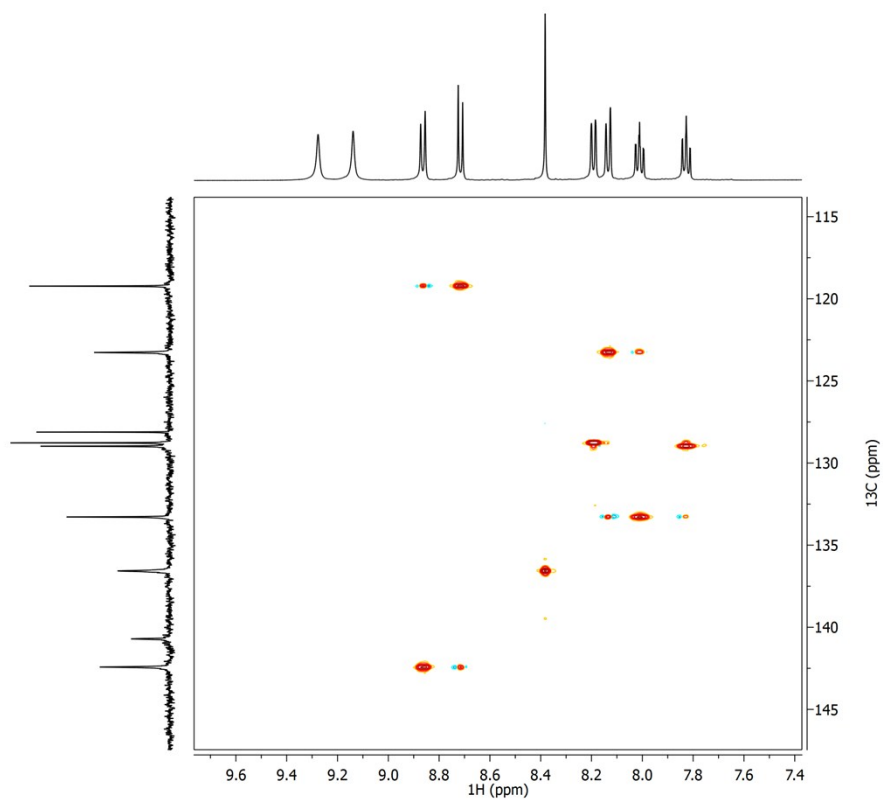

**Figure S6.**  $^1\text{H}$ - $^{13}\text{C}$  HSQC spectrum of **1**.

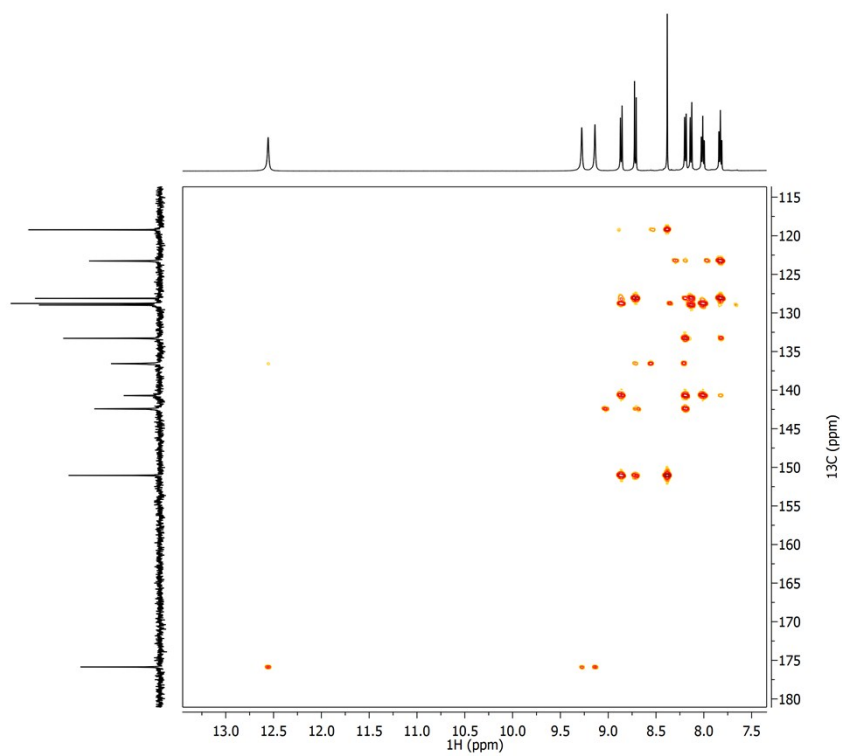

**Figure S7.**  $^1\text{H}$ - $^{13}\text{C}$  HMBC spectrum of **1**.

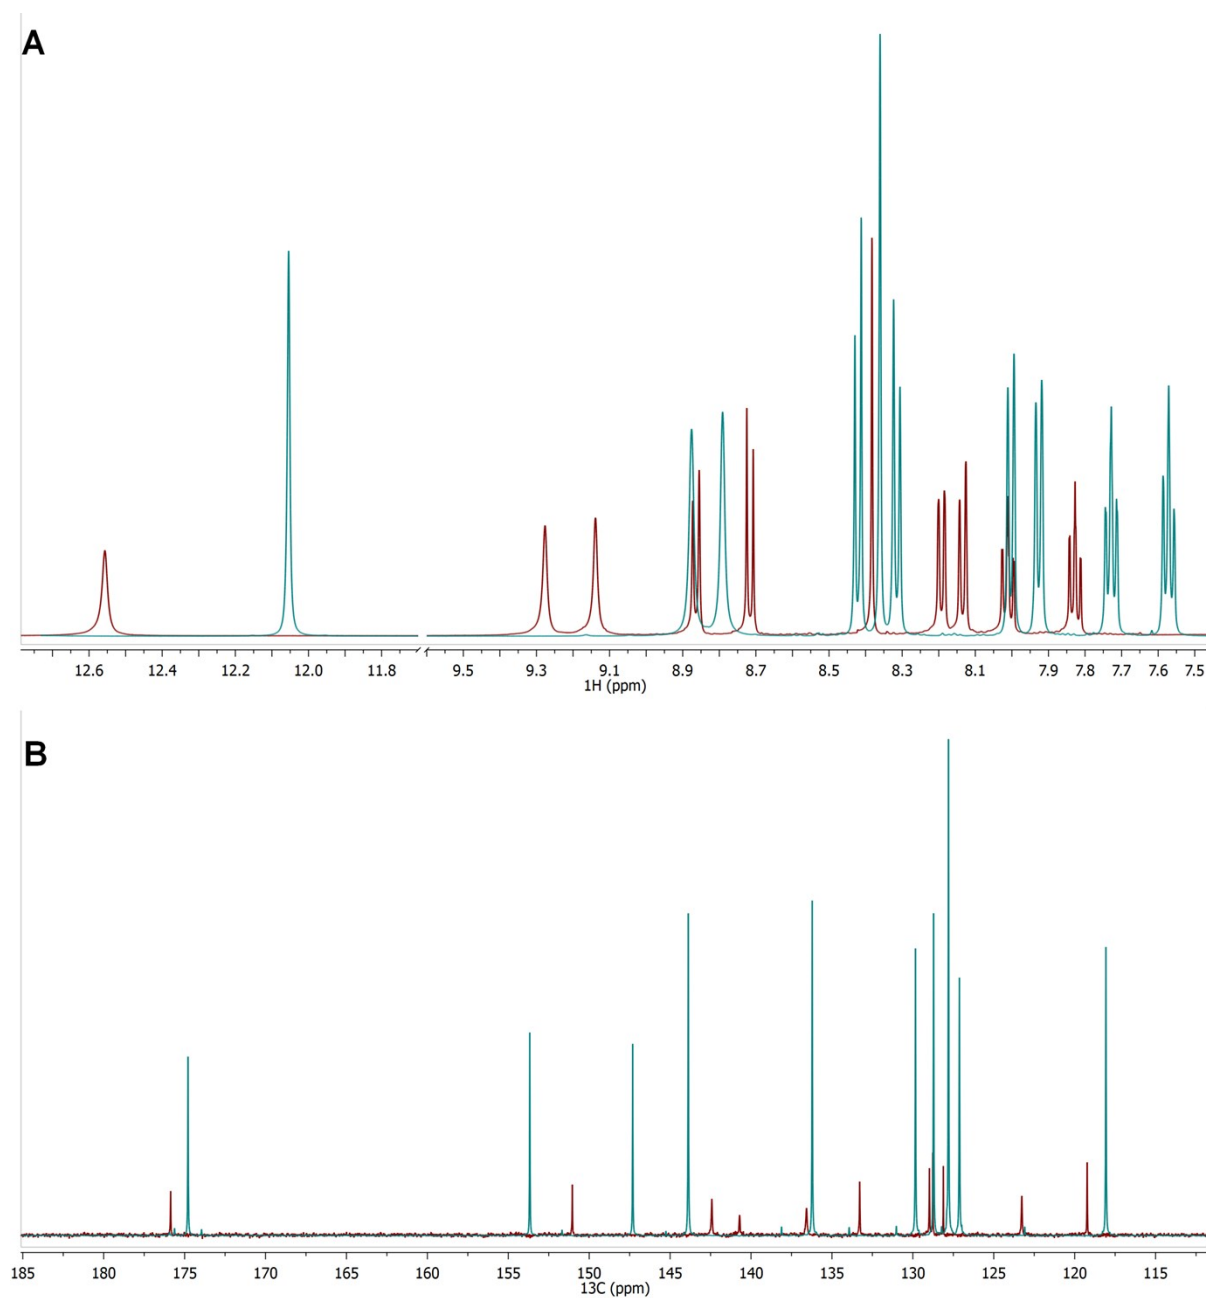

**Figure S8.** Superimposed  $^1\text{H}$  (A) and  $^{13}\text{C}$  NMR spectra (B) of Hqasesc (cyan) and **1** (red).



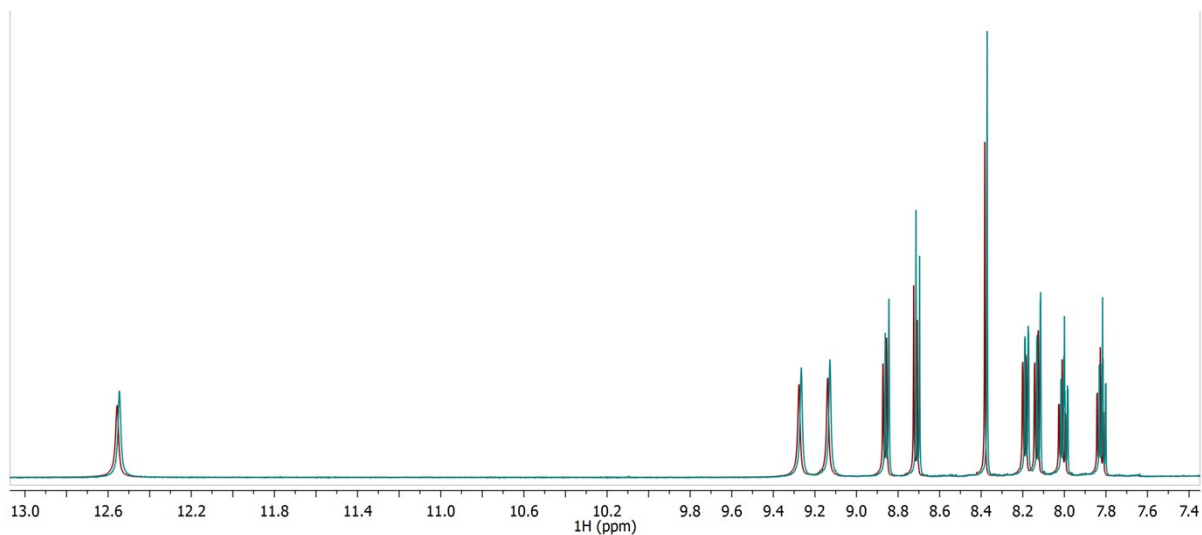

**Figure S9.** Superimposed  $^1\text{H}$  NMR spectra of freshly prepared sample of **1** (cyan) and sample after 24 h (red).

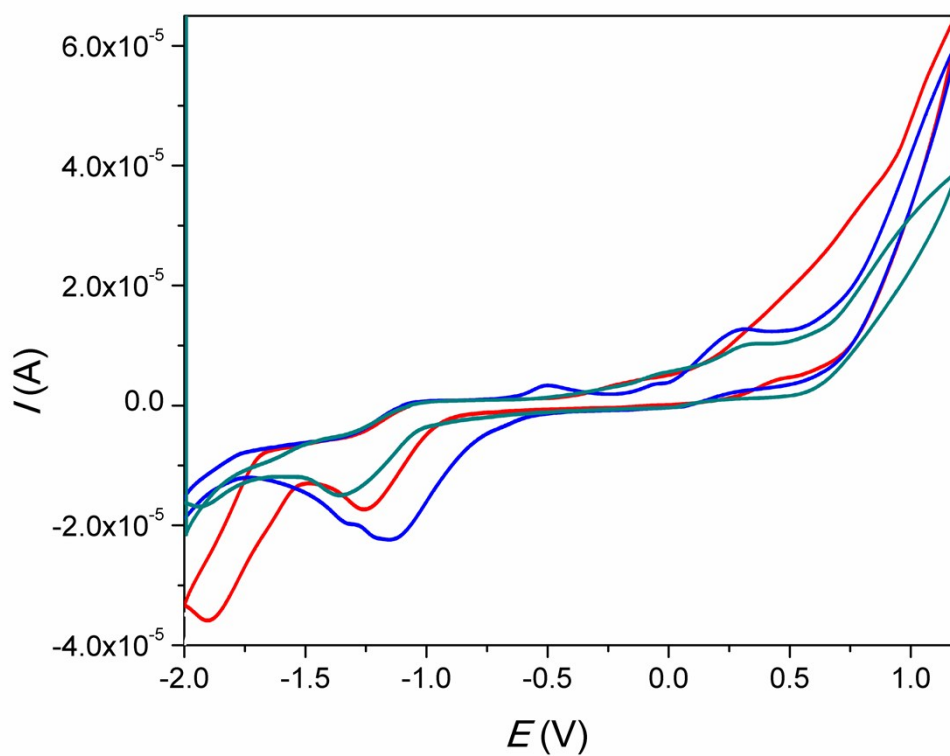

**Figure S10.** Cyclic voltammograms of Hqasesc (cyan), **1** (blue), and **1** with addition of zinc perchlorate (red) in anhydrous DMSO containing 0.10 M  $[\text{n-Bu}_4\text{N}][\text{PF}_6]$  at a scan rate of  $100 \text{ mV s}^{-1}$  using a glassy carbon working electrode.

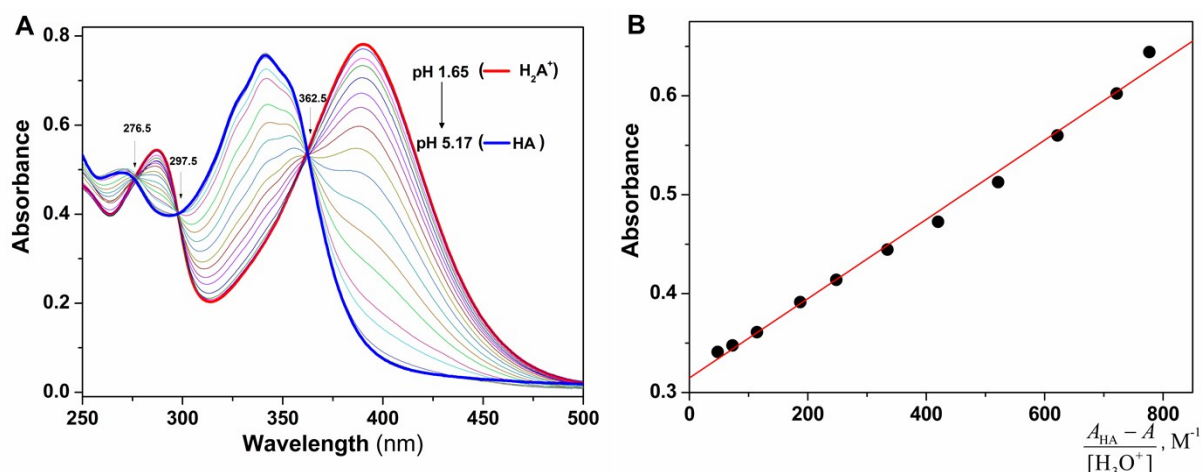

**Figure S11.** (A) UV-Vis spectra of Hqasesc in pH range 1.65–5.17 used for  $pK_{a1}$  determination ( $t = 25\text{ }^{\circ}\text{C}$ ); The spectra were recorded at following pH values: 1.65, 1.83, 2.06, 2.46, 2.71, 3.03, 3.17, 3.33, 3.67, 3.84, 4.13, 4.30, 5.17; Spectra of pure  $\text{H}_2\text{A}^+$ , and HA forms and isosbestic points are indicated. (B) Determination of  $K_{a1}$  at 341 nm according to equation 2; slope =  $4.01 \times 10^{-4}$ , intercept = 0.315,  $r^2 = 0.993$ .

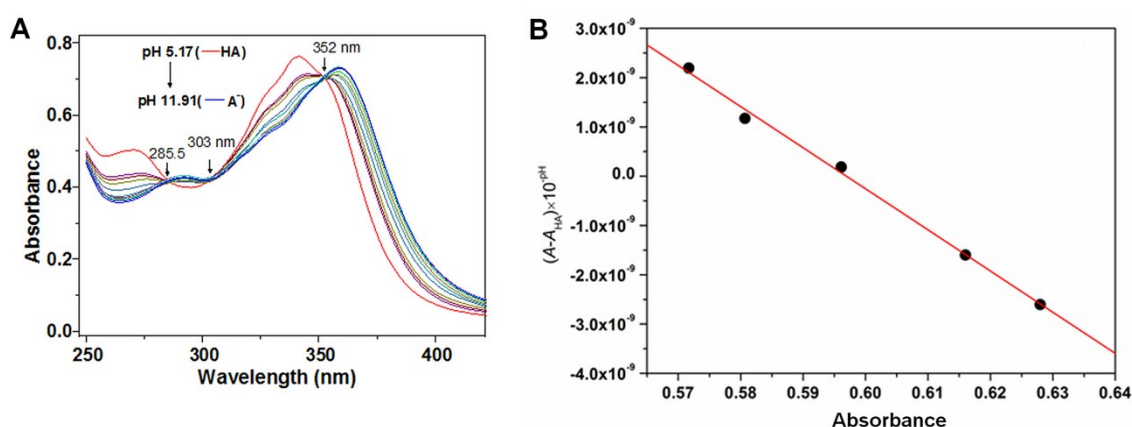

**Figure S12.** (A) UV/Vis Spectra of Hqasesc in pH range 5.17–11.91 used for  $pK_{a2}$  determination ( $t = 25\text{ }^{\circ}\text{C}$ ); The spectra were recorded at following pH values: 5.17, 6.56, 7.01, 7.32, 7.65, 8.06, 8.82, 11.91; Spectra of pure HA and  $\text{A}^-$  forms and isosbestic points are indicated. (B) Determination of  $K_{a2}$  at 365 nm according to equation 3a; slope =  $-8.34 \times 10^{-8}$ , intercept =  $4.97 \times 10^{-8}$ ,  $r^2 = 0.995$ .

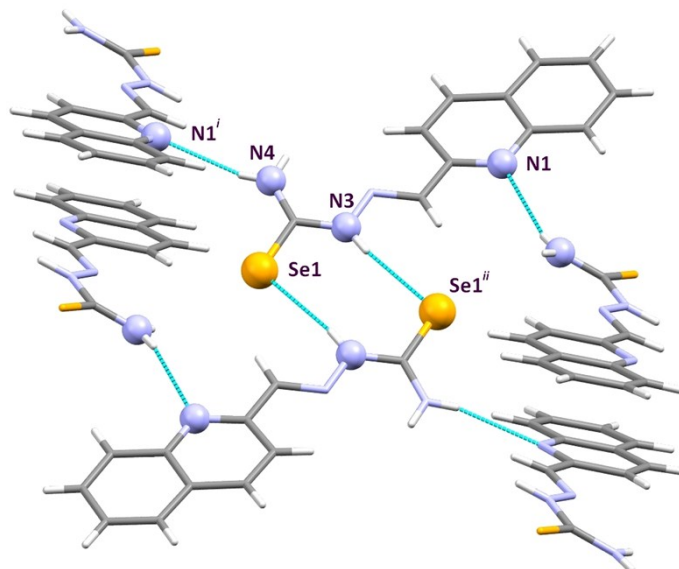

**Figure S13.** Packing diagram in the crystal structure of Hqasesc.

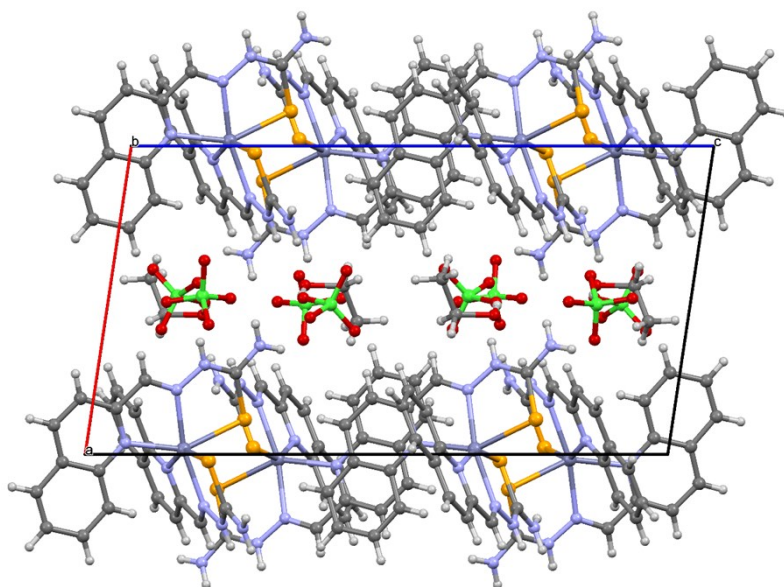

**Figure S14.** Packing diagram in the crystal structure of **1**.

**Table S1.** Hydrogen bonding geometry (Å, °) in Hqasesc and **1**.

| $D-H\cdots A$                       | $D-H$     | $H\cdots A$ | $D\cdots A$ | $D-H\cdots A$ |
|-------------------------------------|-----------|-------------|-------------|---------------|
| Hqasesc                             |           |             |             |               |
| N4–H4A $\cdots$ N1 <sup>i</sup>     | 0.77(4)   | 2.45(4)     | 3.198(3)    | 163(3)        |
| N3–H3 $\cdots$ Se1 <sup>ii</sup>    | 0.86(3)   | 2.68(3)     | 3.533(2)    | 172(3)        |
| <b>1</b>                            |           |             |             |               |
| N3–H3 $\cdots$ O3                   | 0.866(18) | 2.39(3)     | 3.082(4)    | 137(3)        |
| N4–H4A $\cdots$ O3                  | 0.86      | 2.58        | 3.259(5)    | 137.1         |
| N4–H4A $\cdots$ O9A <sup>i</sup>    | 0.86      | 2.49        | 3.041(5)    | 122.7         |
| N4–H4A $\cdots$ O9B <sup>i</sup>    | 0.86      | 2.49        | 2.970(8)    | 116.3         |
| N4–H4B $\cdots$ O4 <sup>i</sup>     | 0.86      | 2.48        | 3.164(5)    | 137.3         |
| N3A–H3A $\cdots$ O9A <sup>ii</sup>  | 0.846(18) | 2.01(2)     | 2.802(4)    | 155(4)        |
| N3A–H3A $\cdots$ O9B <sup>ii</sup>  | 0.846(18) | 1.97(2)     | 2.795(7)    | 163(4)        |
| N4A–H4C $\cdots$ O7 <sup>iii</sup>  | 0.86      | 2.34        | 3.017(5)    | 135.4         |
| N4A–H4C $\cdots$ O9A <sup>ii</sup>  | 0.86      | 2.35        | 3.085(5)    | 143.4         |
| N4A–H4D $\cdots$ Se1 <sup>iii</sup> | 0.86      | 2.67        | 3.447(3)    | 150.1         |
| O9A–H9A1 $\cdots$ O7 <sup>iv</sup>  | 0.82      | 2.19        | 2.955(8)    | 156.1         |
| O9B–H9B $\cdots$ O1                 | 0.82      | 2.08        | 2.818(11)   | 150.1         |

Symmetry codes for Hqasesc: (i)  $x - 1/2, -y + 3/2, z - 1/2$ ; (ii)  $-x + 1, -y + 2, -z + 1$ .  
Symmetry codes for **1**: (i)  $-x + 1, y + 1/2, -z + 1/2$ ; (ii)  $-x, y + 1/2, -z + 1/2$ ; (iii)  $-x, y - 1/2, -z + 1/2$ ; (iv)  $x, y - 1, z$ .

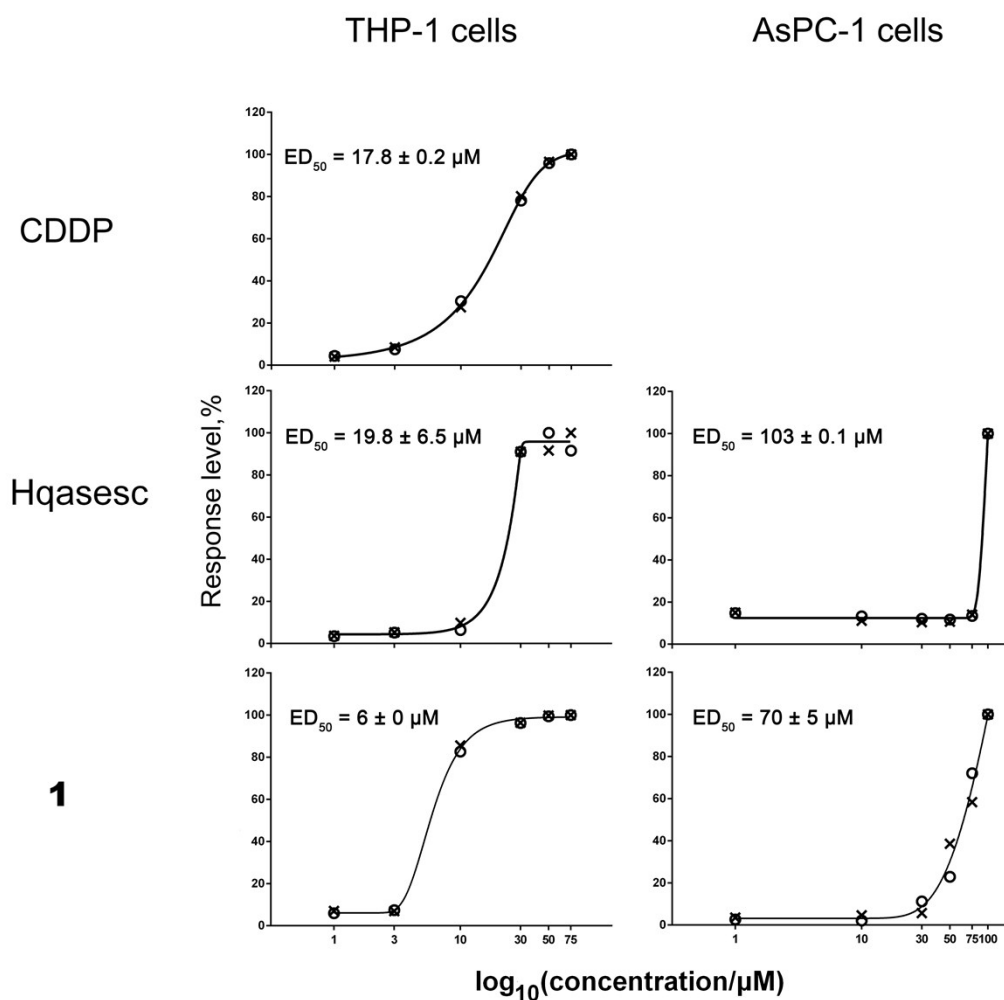

**Figure S15.** ED<sub>50</sub> values for Hqasesc, **1** and CDDP on THP-1 and AsPC-1 cells. THP-1 and AsPC-1 cells were treated with Hqasesc, **1** and CDDP applied in a range of six concentrations for 24 h, and afterwards stained with Annexin-V and PI. Percentages of all Annexin-V labeled cells for each concentration of investigated compounds were calculated as a proportion of the maximal apoptotic response normalized as 100%. Such scaled apoptotic outcomes were plotted against concentrations and ED<sub>50</sub> concentration was calculated using asymmetric sigmoidal curve five-parameter logistic equation (GraphPad Prism 6 software).

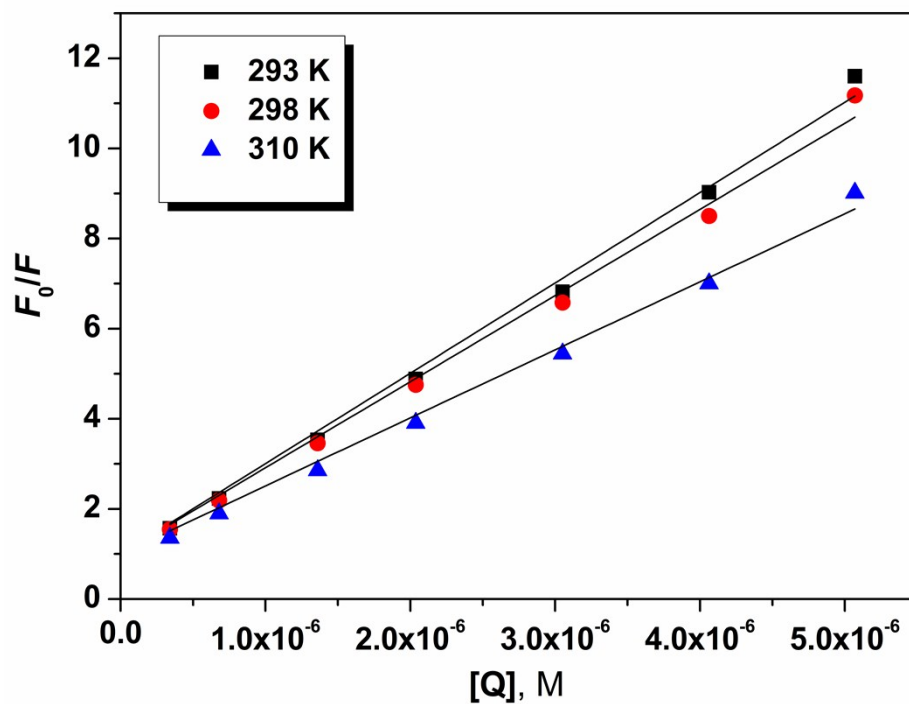

**Figure S16.** Stern-Volmer plot of  $F_0/F$  vs.  $[Q]$  at three different temperatures, where  $F_0$  and  $F$  represents HSA fluorescence intensities in absence ( $F_0$ ) and in presence of the quencher ( $F$ ), and  $[Q]$  is the concentration of the quencher (**1**).

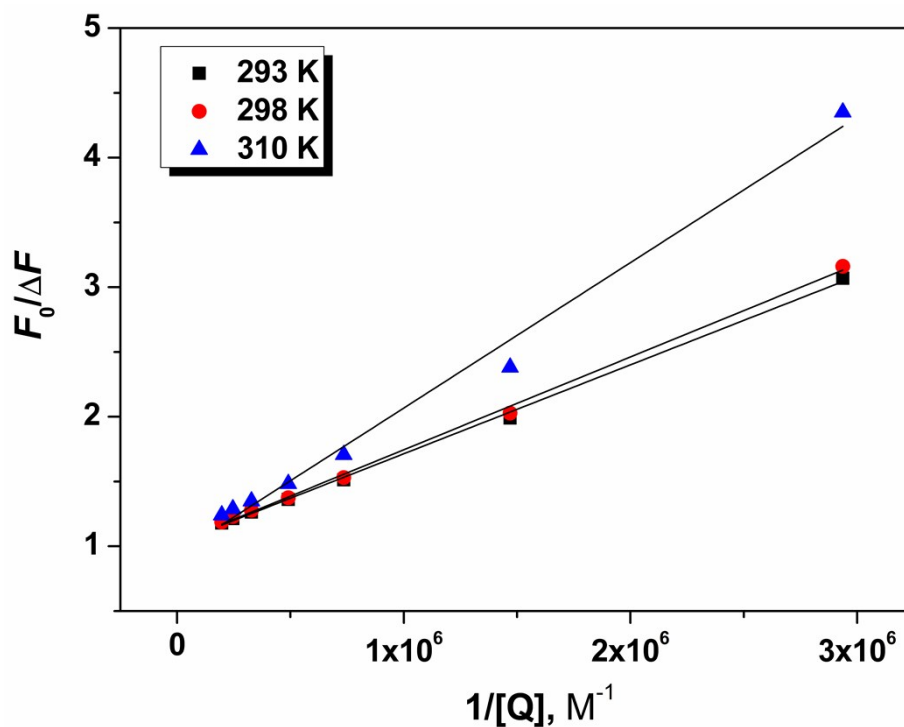

**Figure S17.** Modified Stern-Volmer plot for binding of **1** to HSA at three temperatures.

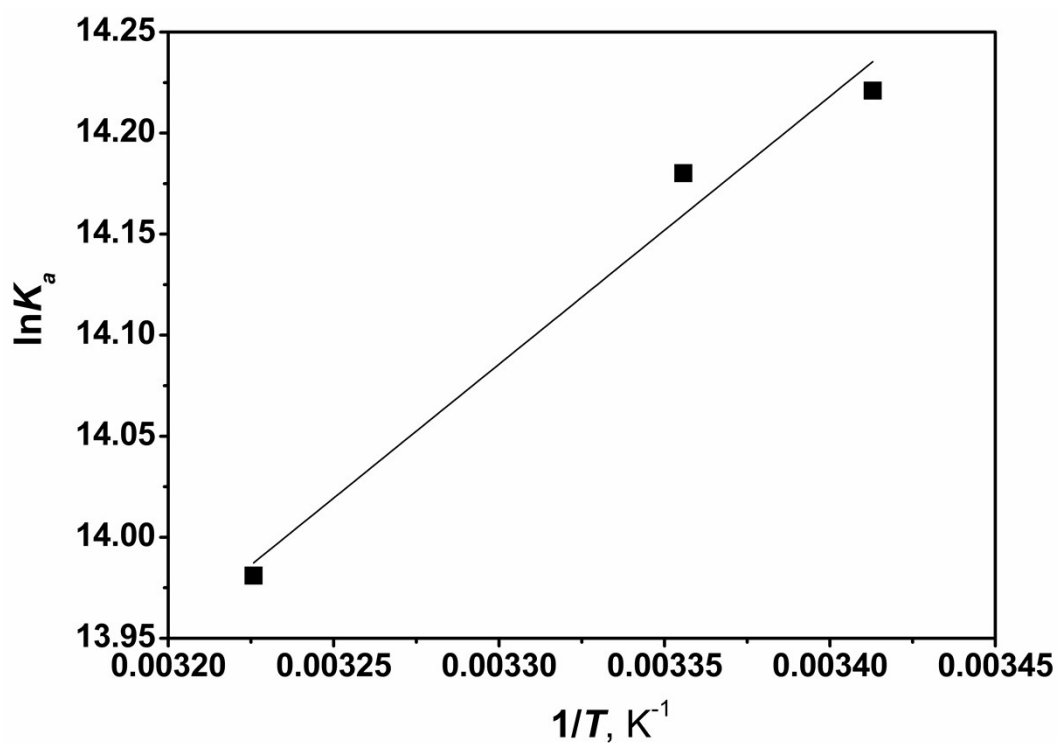

**Figure S18.** The plot of  $\ln K_a$  ( $K_a$  given in  $M^{-1}$ ) vs.  $1/T$  for the interaction of **1** with HSA.

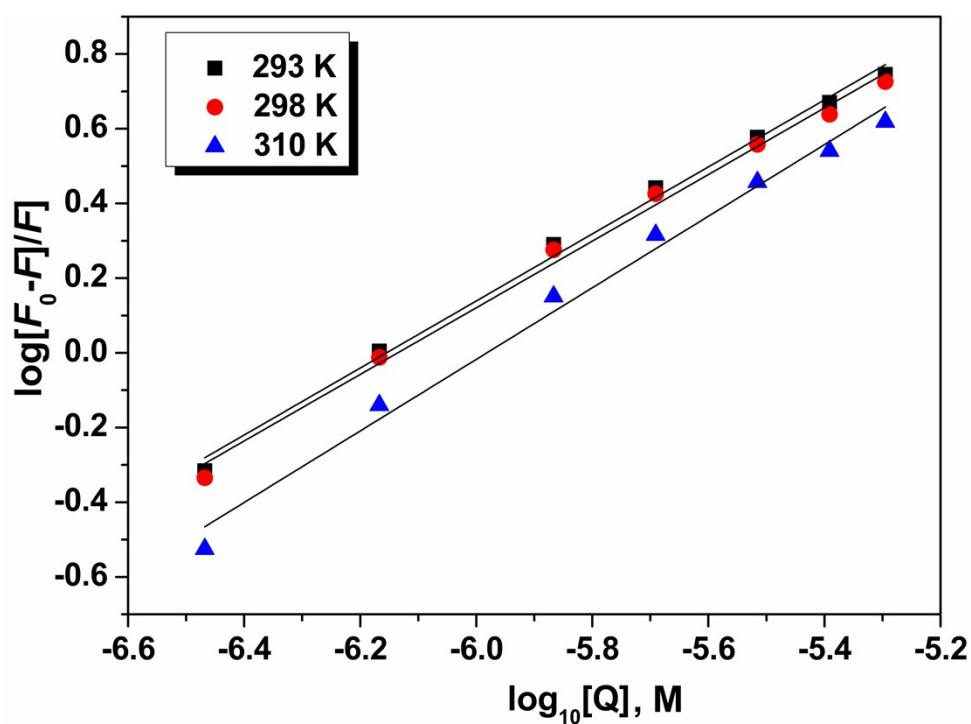

**Figure S19.** Double-log plot for determination of binding constants  $K_b$ , and the number of binding sites  $n$  at three temperatures; Concentration of quencher,  $[Q]$  is given in M.

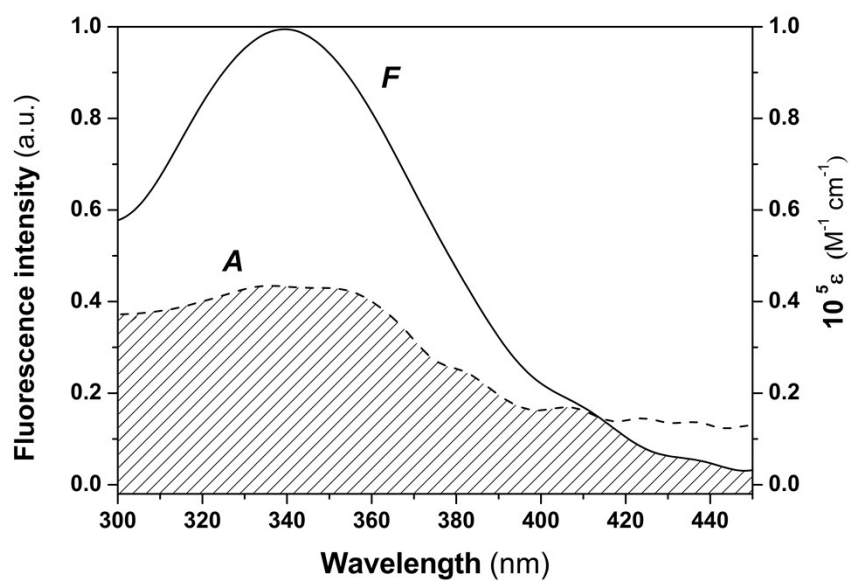

**Figure S20.** Spectral overlap of complex **1** absorption (curve *A*, dashed line) with HSA fluorescence emission (*F*, solid line);  $c(\text{HSA}) = c(\mathbf{1}) = 5 \times 10^{-7} \text{ M}$ ;  $T = 298 \text{ K}$ .

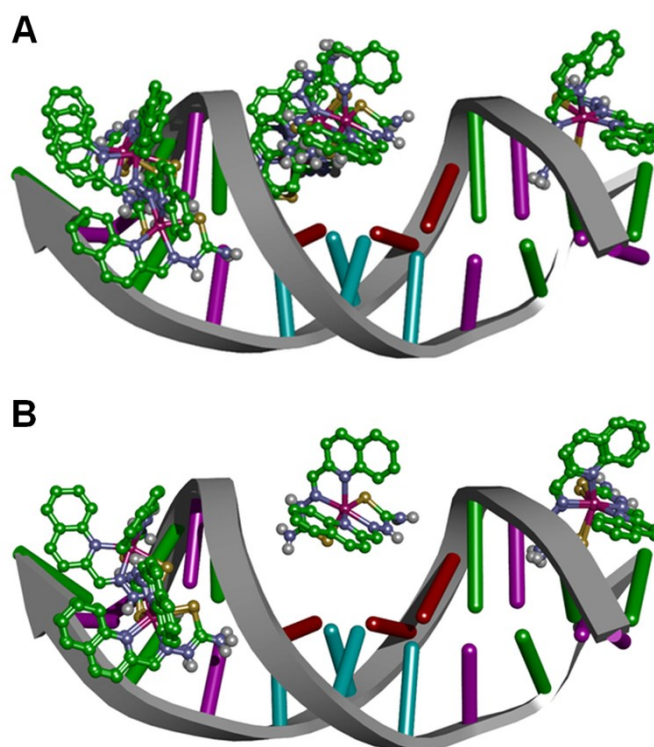

**Figure S21.** All conformations of complex **1** in the DNA duplex of sequence  $\text{d}(\text{CGCGAATTCGCG})_2$  from PDB IDs 3U2N<sup>S1</sup> (A) and 4U8A<sup>S2</sup> (B).



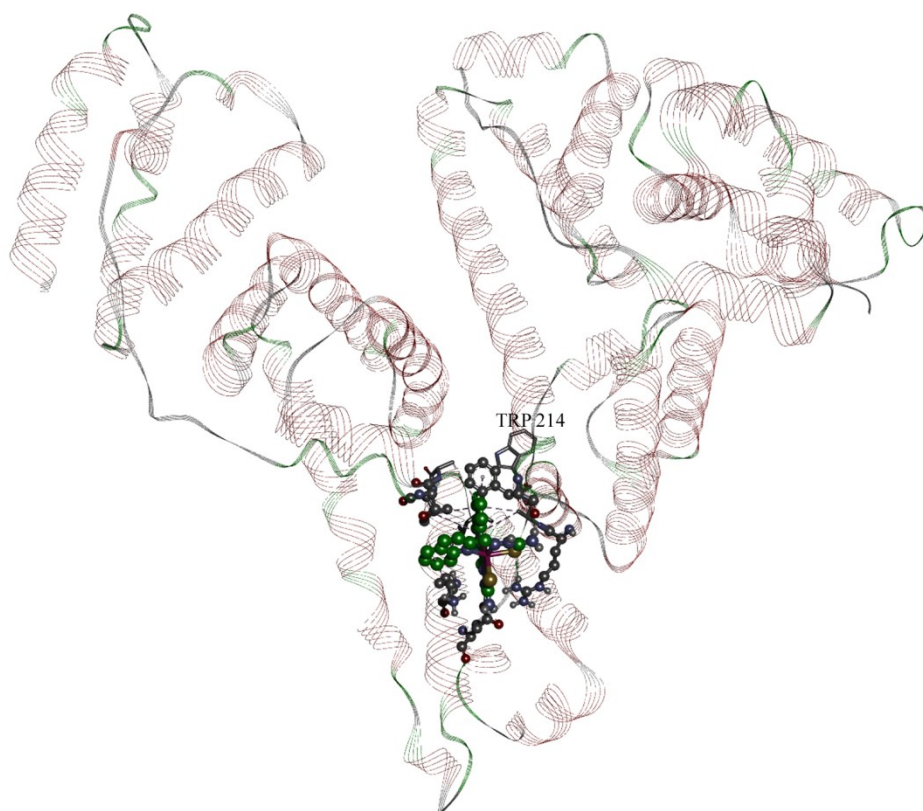

Figure S22. Structure of HSA (PDB ID 1BJ5<sup>S3</sup>) and the location of complex 1 binding site.

**Table S2.** Interactions of HSA binding site atoms with **1**.

| Residue (atom)     | Interaction type             | Distance |
|--------------------|------------------------------|----------|
| Glu 354 (OE1)      | Hydrogen bond/electrostatic  | 2.089    |
| Glu 354 (OE1)      | Hydrogen bond/ electrostatic | 2.726    |
| Phe 206 (O)        | Hydrogen bond                | 1.987    |
| Ala 210            | Hydrophobic CH- $\pi$        | 4.639    |
| Ala 210            | Hydrophobic CH- $\pi$        | 3.725    |
| Leu 347            | Hydrophobic CH- $\pi$        | 4.968    |
| Lys 351            | Hydrophobic CH- $\pi$        | 5.074    |
| Leu 481            | Hydrophobic CH- $\pi$        | 4.903    |
| Val 482            | Hydrophobic CH- $\pi$        | 4.814    |
| Val 482            | Hydrophobic CH- $\pi$        | 5.247    |
| Phe 206            | Hydrophobic / $\pi$ - $\pi$  | 4.603    |
| Arg 209 (NH1) – Se | Hydrogen bond                | 2.749    |

## References

- S1 D.G. Wei, , W.D. Wilson and S. Neidle, *J. Am. Chem. Soc.*, 2013, **135**, 1369–1377.
- S2 W. Zhu, Y. Wang, K. Li, J. Gao, C.H. Huang, C.C. Chen, T.P. Ko, Y. Zhang, R.T. Guo and E. Oldfield, *J. Med. Chem.*, 2015, **58**, 1215–1227.
- S3 S. Curry, H. Mandelkow, P. Brick and N. Franks, *Nat. Struct. Biol.*, 1998, **5**, 827–835.
